# Supplementary material
Source: PubMed Central journal article supplement (PMC3962683)
Supplement: halms838410-supplement_1.pdf [file halms838410-supplement_1.pdf]

## Supplementary Materials.

Fig. 1

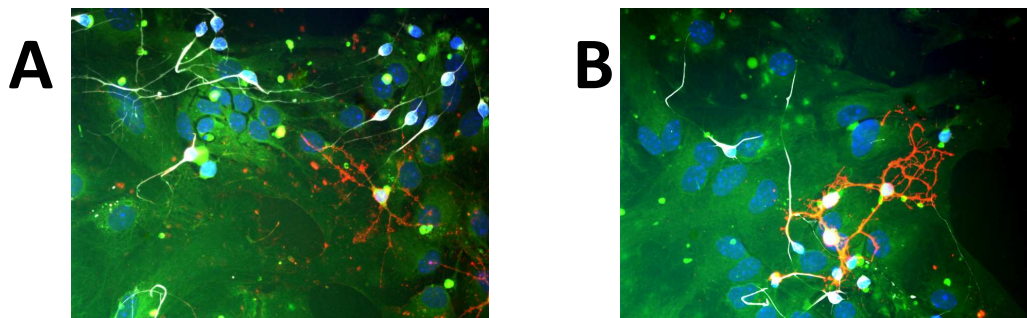

C

| Probe set ID | Gene name                                           | Gene symbol | Variation fold |
|--------------|-----------------------------------------------------|-------------|----------------|
| 10576332     | tubulin, beta 3                                     | Tubb3       | 1.0            |
| 10547807     | enolase 2, gamma neuronal                           | Eno2        | 1.1            |
| 10383920     | neurofilament, heavy polypeptide                    | Nefh        | 1.0            |
| 10421100     | neurofilament, medium polypeptide                   | Nefm        | 1.0            |
| 10416175     | neurofilament, light polypeptide                    | Nefl        | 1.0            |
| 10593293     | neural cell adhesion molecule                       | Ncam1       | 1.1            |
| 10389047     | amiloride-sensitive cation channel 1, neuronal      | Accn1       | 0.9            |
| 10426782     | amiloride-sensitive cation channel 2, neuronal      | Accn2       | 1.0            |
| 10391798     | glial fibrillary acidic protein                     | GFAP        | 0.9            |
| 10360227     | phosphoprotein enriched in astrocytes 15A           | Pea15a      | 0.9            |
| 10530847     | phosphoprotein enriched in astrocytes 15B           | Pea15b      | 1.1            |
| 10596575     | mesencephalic astrocyte-derived neurotrophic factor | Manf        | 1.1            |
| 10381154     | 2',3'-cyclic nucleotide 3' phosphodiesterase        | Cnp         | 1.0            |
| 10457022     | myelin basic protein                                | Mbp         | 1.0            |
| 10436828     | oligodendrocyte transcription factor 1              | Olig1       | 0.8            |
| 10436823     | oligodendrocyte transcription factor 2              | Olig2       | 0.8            |
| 10361895     | oligodendrocyte transcription factor 3              | Olig3       | 1.0            |
| 10405058     | oligodendrocyte myelin glycoprotein                 | Omg         | 1.0            |
| 10450845     | myelin oligodendrocyte glycoprotein                 | Mog         | 1.1            |

Fig. 2

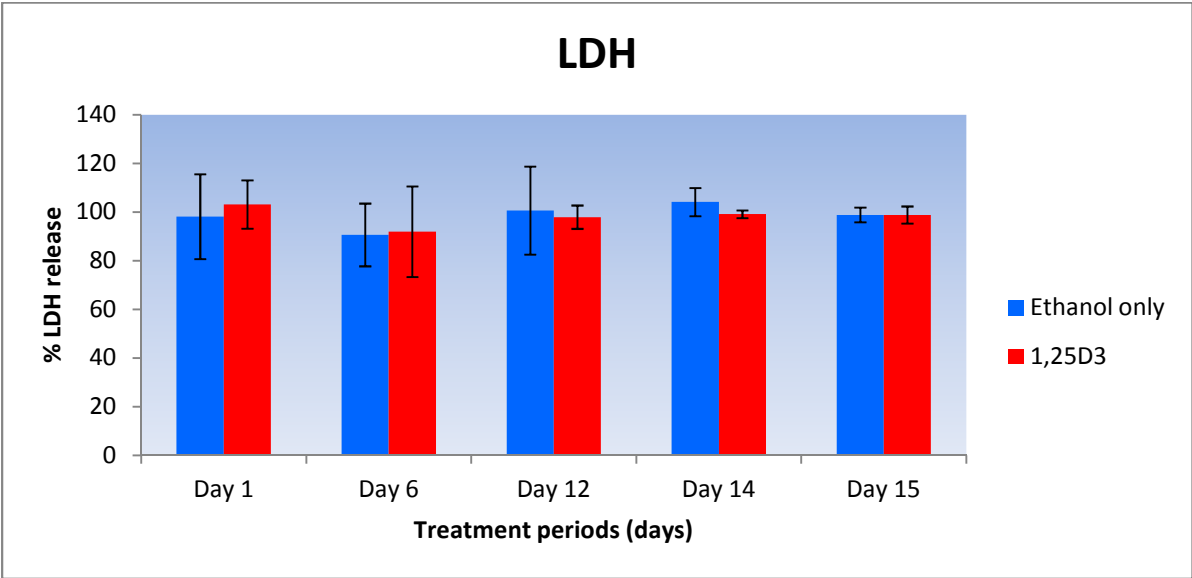

**Fig. 3**

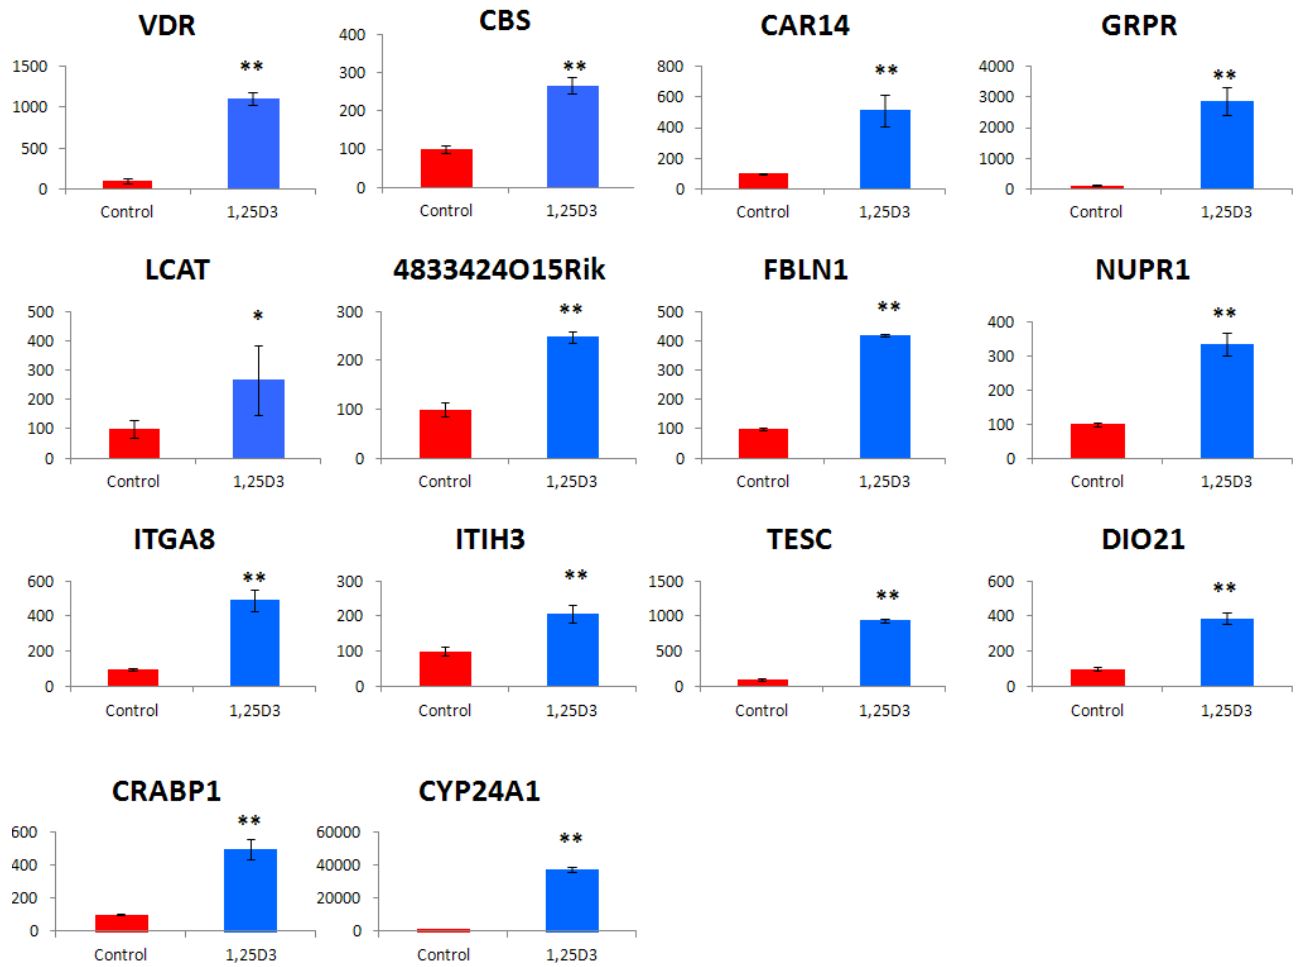

| <b>Gene</b>   | <b>Forward</b>          | <b>Reverse</b>           |
|---------------|-------------------------|--------------------------|
| ACTB          | ACCAGAGGCATACAGGGACA    | CTAAGGCCAACCGTGAAAAG     |
| CAR14         | GTTTCCCAGCCGCTTCTT      | TGGGTCTAGGTGTGGGAATC     |
| CBS           | GCAGTGACAACCCCAAACA     | GCCTGGTCAGGAGTGGTG       |
| CRABP1        | TGTGCAGTGAATCTTGTCTCA   | AAGGTCGGAGAGGGCTTC       |
| CYP24a1       | TCTTGATTTGGGGGTGAAAA    | CTGCCATTGCGTTCTGT        |
| DIO2          | GGAATTGGGAGCATCTTCAC    | CTGCGCTGTGTCTGGAAC       |
| FBLN1         | CGGCACTGCTGCTTACAG      | CAGGACCAGCTAAGATTCTT     |
| GRPR          | CTTCCGGGATTCGATCTG      | TGATTCAGAGTGCCTACAATCTTC |
| ITGA8         | AGTTCTGTGCTCCTCTTGAA    | TGGAGAATTCACTGGGGACT     |
| ITIH3         | CTCTGGGAGGCTCCGTTT      | CTCTGGCTTGGAGACCTCTG     |
| LCAT          | GAGGGGGAGAAACAAGTTGA    | ACACGGCCTGTCATCCTC       |
| NUPR1         | GTGTGGTGTCTGTGGTCTGG    | GAAGCTGCTGACCAAGTTCC     |
| 4833424O15Rik | GGAGCTAGGTTTCCTGTAACCAC | AACCGTCCGATTTCTTGGA      |
| SLC7a3        | GAGGAACAGCAGGCACCTT     | AATTTCTGGGGTTCATCTGGA    |
| VDR           | CTTCTCTGGGGACTCCTCCT    | TGGACGAGTCCATCATGTCT     |
| Tesc          | AGGGTTTCCCGAGAGCAG      | TCACGAAAGGAGAAGCTGAAAT   |
| Cyp24a1       | TCTTGATTTGGGGGTGAAAA    | CTGCCATTGCGTTCTGT        |
| SDHA          | CAGTTCCACCCACAGGTA      | TCTCCACGACACCCTTCTGT     |

**Table 1**
